# Supplementary material
Source: PubMed Central journal article supplement (PMC6380498)
Supplement: NIHMS1517877-supplement-Supplemental_Digital_Content.pdf [file NIHMS1517877-supplement-Supplemental_Digital_Content.pdf]

1 **Anti-HIV IgM protects against mucosal SHIV transmission**

2

3 Siqi GONG<sup>a,b\*</sup>, Khamis TOMUSANGE<sup>a\*</sup>, Viraj KULKARNI<sup>a</sup>, Opeyemi S. ADENIJI<sup>a,b</sup>, Samir  
4 K. LAKHASHE<sup>a</sup>, Dinesh HARIRAJU<sup>a</sup>, Amanda STRICKLAND<sup>a</sup>, Elizabeth PLAKE<sup>a</sup>, Patrice  
5 A. FROST<sup>c</sup>, Sarah J. RATCLIFFE<sup>d</sup>, Liping WANG<sup>e</sup>, Eileen M. LAFER<sup>e</sup>, Ruth M.  
6 RUPRECHT<sup>a,b,c</sup>

7

8 \*These authors contributed equally to this work

9 <sup>a</sup>Department of Virology and Immunology, Texas Biomedical Research Institute, 8715 W  
10 Military Dr, San Antonio, Texas, USA

11 <sup>b</sup>Department of Microbiology, Immunology & Molecular Genetics, The University of Texas  
12 Health Science Center at San Antonio, 7703 Floyd Curl Drive, San Antonio, Texas, USA

13 <sup>c</sup>Southwest National Primate Research Center, Texas Biomedical Research Institute, 8715 W  
14 Military Dr, San Antonio, Texas, USA

15 <sup>d</sup>Division of Biostatistics, Department of Public Health Sciences, University of Virginia, P.O.  
16 Box 800717, Charlottesville, Virginia, USA

17 <sup>e</sup>Department of Biochemistry and Structural Biology, Center for Biomedical Neuroscience, The  
18 University of Texas Health Science Center at San Antonio, 7703 Floyd Curl Drive, San Antonio,  
19 Texas, USA.

20

21 **Supplemental digital content**

22 Methods

23 Results

24 References (1-5)

25

## 26 **Methods**

### 27 **Preparation of 33C6 mAbs**

28 We previously described the production of 33C6-IgG1 mAb [1]; 33C6-IgM mAb was prepared as  
29 follows. Human  $\mu$  chain constant region and human  $\lambda$  chain constant region were PCR amplified  
30 from pFUSEss-CHIg-hM and pFUSE2-CLIg-hl2 (InvivoGen) using Q5 High-Fidelity 2X Master  
31 Mix (NEB) following the manufacturer's recommendation. Following gel purification, PCR  
32 products were assembled with a Kozak-murine Ig leader sequence and cloned downstream of a  
33 CMV promoter in a pcDNA3.4 plasmid (ThermoFisher Scientific) using NEBuilder HiFi DNA  
34 Assembly Master Mix (NEB). The resulting plasmids were designated pTBRI-hM and pTBRI-hl,  
35 respectively. 33C6 heavy chain and light chain variable gene fragments were PCR amplified from  
36 the 33C6-IgG1 expression plasmids [2] and cloned into pTBRI-hM and pTBRI-hl to yield  
37 plasmids pTBRI-33C6-hM and pTBRI-33C6-hl, respectively. Full-length 33C6-IgM mAb was  
38 expressed in Expi293F cells (ThermoFisher Scientific) transiently co-transfected with pTBRI-  
39 33C6-hM, pTBRI-33C6-hl and human J chain precursor expression plasmids [2] using  
40 ExpiFectamine 293 Transfection Kit (ThermoFisher Scientific). Cells were maintained in Expi293  
41 expression medium (ThermoFisher Scientific) for 4 days at 37°C, 8% CO<sub>2</sub> with continuous shaking  
42 at 135 rpm. Antibody was purified from filtered supernatants using Thiophilic Resin (G-  
43 Biosciences) followed by HiTrap SP HP column separation (GE Healthcare Life Sciences). Purity  
44 and polymeric state of 33C6-IgM was verified under denaturing and non-reducing polyacrylamide  
45 gel electrophoresis (NuPAGE™ 3-8% Tris-Acetate Protein Gel, ThermoFisher Scientific). The  
46 presence of human  $\mu$  and J chains was verified by western blot with horse-radish peroxidase  
47 (HRP)-conjugated goat anti-human IgM, Fc5 $\mu$  fragment-specific antibody (Jackson

48 ImmunoResearch) and J-chain antiserum (InvivoGen) in conjunction with HRP-conjugated  
49 donkey anti-rabbit IgG(H+L) (Jackson ImmunoResearch), respectively.

50

### 51 **Dynamic light scattering studies**

52 The particle sizes of the purified 33C6-IgM and 33C6-IgG1 were measured by Dynamic Light  
53 Scattering in PBS at 24°C using a Protein Solutions DynaPro (Wyatt Technology) and analyzed  
54 with Dynamics software (Wyatt Technology). The predicted molecular weight of 33C6-IgM and  
55 33C6-IgG1 was calculated based on the amino acid sequences using compute pI/Mw tool at  
56 ExPASy Bioinformatics Resource Portal (SIB Swiss Institute of Bioinformatics;  
57 [https://web.expasy.org/compute\\_pi/](https://web.expasy.org/compute_pi/)).

58

### 59 **Surface plasmon resonance (SPR) studies**

60 SPR studies were carried out utilizing a Biacore T200 instrument on a CM5 chip in HBS-EP+  
61 running buffer (10 mM Hepes, 150 mM NaCl, 3 mM EDTA, 0.05% surfactant P20) at 25°C. An  
62 anti-human IgM Fc5 $\mu$  fragment-specific capture antibody (Jackson ImmunoResearch) was  
63 immobilized on FC1 and FC2 utilizing an amine coupling kit (GE Healthcare). An anti-human  
64 IgG Fc capture antibody from a human IgG capture kit (GE Healthcare) was immobilized on FC3  
65 and FC4 utilizing an amine coupling kit (GE Healthcare). 33C6-IgM was captured on FC2, and  
66 33C6-IgG1 was captured on FC4. A concentration series of SHIV-1157ip gp120 ranging from 4.6  
67 pM to 10 nM was flowed over all 4 surfaces at 100  $\mu$ l/min, interspersed with buffer blanks for  
68 double referencing. During each cycle, gp120 was injected for 220 s, followed by a change to  
69 running buffer for 3000 s. FC1 and FC2 were regenerated by an injection of 10 mM glycine pH  
70 1.7 for 180 s at 20  $\mu$ l/min, while FC3 and FC4 were regenerated by an injection of 3 M MgCl<sub>2</sub> for

71 30 s at 20  $\mu$ l/min. Data were double referenced, first by subtracting the reference cell data from  
72 the experimental cell data (i.e., FC2-FC1) and (FC4-FC3), and then by subtracting the buffer  
73 blanks. Overlay plots were made for all curves from 41 pM - 10 nM, and data were globally fit to  
74 a 1:1 binding model utilizing Biacore T200 evaluation software v. 2.0 (GE Healthcare), from  
75 which the association rate constant  $k_a$ , the dissociation rate constant  $k_d$ , and the equilibrium  
76 dissociation constant  $K_D$  were derived. Average values for each quantity were determined from 3  
77 replicates, and average values and standard error were calculated utilizing OriginPro 2017  
78 Software (OriginLab Corp.), and are indicated directly on Fig. 1c and Fig. 1d. The fit parameters  
79 for the IgM data set shown in Fig. 1c are  $k_a = 4.0 \times 10^6 \text{ M}^{-1}\text{s}^{-1}$ ,  $k_d = 1.2 \times 10^{-5} \text{ s}^{-1}$ ,  $K_D = 2.9 \text{ pM}$ ,  $\chi^2$   
80  $= 0.030 \text{ RU}^2$ . The fit parameters for the IgG1 data set shown in Fig. 1d are  $k_a = 3.0 \times 10^5 \text{ M}^{-1}\text{s}^{-1}$ ,  
81  $k_d = 4.3 \times 10^{-5} \text{ s}^{-1}$ ,  $K_D = 146 \text{ pM}$ ,  $\chi^2 = 0.042 \text{ RU}^2$ .

82

### 83 **Animals**

84 Eighteen adult, outbred, naïve, male, Indian-origin rhesus monkeys (RMs) (*Macaca mulatta*) were  
85 housed at the Southwest National Primate Research Center (SNPRC), San Antonio, Texas.  
86 SNPRC, a facility fully accredited by the Association for Assessment and Accreditation of  
87 Laboratory Animal Care International, adheres to the Guide for the Care and Use of Laboratory  
88 Animals. All procedures were approved by the Animal Care and Use Committee of Texas  
89 Biomedical Research Institute, SNPRC's parent institution. All RMs were negative for Mamu-  
90 B\*17 allele associated with spontaneous virologic control; one RM 32547 (randomized to the  
91 control group) was positive for the Mamu-B\*08 allele also associated with spontaneous virologic  
92 control. Similarly, RMs with the Mamu-A\*01 allele that contributes to spontaneous virologic  
93 control were evenly distributed in each group. RMs were randomized into groups (n = 6 per group).

94

95 **Plasma viral RNA (vRNA) loads**

96 RNA was isolated by QIAamp Viral RNA Mini-Kits (Qiagen), and vRNA levels were measured  
97 by quantitative reverse-transcriptase polymerase chain reaction (qRT-PCR) for SIV *gag* sequences  
98 [3]. Assay sensitivity was 50 vRNA copies/ml. Time to first detection of viremia was analyzed by  
99 Kaplan-Meier analysis.

100

101 **ELISAs**

102 Plasma mAb binding to SHIV-1157ip gp120 was evaluated by ELISA as described [1]. Briefly,  
103 plates were coated with monomeric SHIV-1157ip gp120 (1 µg/ml) in 100 µl carbonate buffer (0.05  
104 M carbonate-bicarbonate buffer, pH 9.6, Sigma) overnight at 4°C, washed 3x with 0.05% Tween  
105 20 in PBS (0.05% PBS/T), and blocked with 4% non-fat milk in PBS for 1 h at 37°C. One hundred  
106 µl of heat-inactivated plasma diluted serially in dilution buffer (1% non-fat milk in PBS) were  
107 added to duplicate wells and incubated for 2 h at 37°C. Plates were washed 3x in 0.05% PBS/T,  
108 and binding was detected with HRP-conjugated rabbit anti-monkey IgG (whole molecule) (Sigma)  
109 antibody. After 1 h of incubation at 37°C, 3,3',5,5'-Tetramethylbenzidine (TMB) single solution  
110 (ThermoFisher Scientific) was added, and the reaction was terminated by the addition of 1 N  
111 H<sub>2</sub>SO<sub>4</sub>. Plates were read at 450 nm by a Mithras LB 940 Multimode Microplate Reader (Berthold  
112 Technologies). Antibody titers were calculated as the reciprocal sample dilution giving optical  
113 density (OD) > mean + 5x standard deviation of background (pre-immune samples) at the same  
114 dilution.

115

116 Epitope binding specificity for 33C6-IgM mAbs was determined by ELISA with consensus  
117 clade C peptides (NIH AIDS Research and Reference Reagent Program) performed as described  
118 above. Briefly, plates were coated with corresponding peptides (5 µg/ml) in triplicates, blocked

119 and probed with various concentration of 33C6-IgM or human serum IgM (Sigma). To detect  
120 binding, plates were probed with HRP-conjugated goat anti-human IgM antibody (Jackson  
121 ImmunoResearch). The sequences of the various peptides used were as follows: peptide 9258,  
122 VEIVCTRPNNNTRKS; peptide 9259, CTRPNNNTRKSIRIG; peptide 9260,  
123 NNNTRKSIRIGPGQT; peptide 9261, RKSIRIGPGQTFYAT and peptide 9262,  
124 RIGPGQTFYATGDII.

125

### 126 **Avidity assay**

127 Analysis of antibody avidity was performed as described [4]. Briefly, ELISA plates were coated  
128 with 50 µg/ml concanavalin A (Sigma) for 1 h at room temperature. After overnight incubation  
129 with 2 µg/ml monomeric SHIV-1157ip gp120 at 4°C, plates were blocked with 3% N-Z-Case plus  
130 (Sigma) 0.5% PBS/T for 1 h at 37°C, then incubated with 50 µl of serial dilutions of mAbs in two  
131 sets of triplicate wells for 1 h at 37°C. One hundred µl of 8 M urea solution (Sigma) was added to  
132 one set of the triplicate wells, and 100 µl of PBS was added to the other set of triplicate wells and  
133 incubated 3x (5 min each with wash steps in between) at 37°C. Then wells were washed thoroughly  
134 with 0.05% PBS/T and incubated with HRP-conjugated goat anti-human IgG1 or HRP-conjugated  
135 goat anti-human IgM (Jackson ImmunoResearch). Finally, the colorimetric reaction was  
136 developed with TMB single solution (ThermoFisher Scientific) and terminated with 1 N H<sub>2</sub>SO<sub>4</sub>.  
137 Avidity index (AI) was calculated as follows:

138 
$$AI (\%) = (OD_{450 \text{ nm of samples washed with 8 M urea}} / OD_{450 \text{ nm of samples washed with}} \\ 139 \text{ PBS}) \times 100.$$

140

141

142 **Neutralization assay**

143 Neutralization of SHIV-1157ipEL-p by 33C6 mAbs or antibodies in RM plasma was determined  
144 using the TZM-bl assay as described [5]. Briefly, virus was incubated with serially diluted mAbs  
145 or plasma for 1 h at 37°C. TZM-bl cells ( $5 \times 10^3$ /well) and DEAE-dextran (Sigma) were added to  
146 the virus without antibody (baseline) or with antibodies. After incubation for 48 h at 37°C,  
147 luciferase activity was quantified in a CentroPRO LB 962 Budget Microplate Luminometer  
148 (Berthold Technologies) upon addition of Bright-Glo luciferase assay substrate (Promega).  
149 VRC01-IgG1 was used as positive control; IgM isotype control (ThermoFisher Scientific) and Fm-  
150 6-IgG1 were used as negative controls. Percentage neutralization was calculated relative to  
151 baseline luciferase activity or luciferase activity level of pre-immune samples for 33C6 mAb or  
152 RM plasma sample neutralization, respectively. Neutralizing antibody titers were estimated as the  
153 reciprocal serum dilution giving 50% inhibition of virus replication.

154

155 **Virion capture assay (VCA)**

156 We performed the VCA as follows. Briefly, 10 µg/ml of 33C6 mAbs were coincubated with  $10^8$   
157 vRNA copies/ml of SHIV-1157ipEL-p (in 200 µl reaction) for 1 h at 37°C to form antibody-virion  
158 immune complexes (ICs). To enable capture of IgM-virus complexes by the Protein G micro beads  
159 (Miltenyi Biotec), the ICs were incubated for additional 1 h at 37°C in the presence of 20 µg/ml  
160 goat anti-human IgM antibody (Jackson ImmunoResearch). After ICs were mixed with Protein G  
161 micro beads for 30 min at 37°C, the mixture was loaded to a µ Column (Miltenyi Biotec) under a  
162 magnetic field and washed. Unbound free virions were collected in the flow-through and measured  
163 by Gag p27 ELISA (Advanced BioScience Laboratories). The infectivity of the flow-through virus  
164 was evaluated by TZM-bl assay. A virus-only control (no antibody) was used to set maximum

165 limit of infectivity; VRC01-IgG1 was used as positive control; IgM isotype control (ThermoFisher  
166 Scientific) and Fm-6-IgG1 were used as negative controls.

167 The percentage of total physical virus particles captured (pVirion) was calculated as:  
168  $pVirion = [1 - (p27 \text{ concentration of virus with mAbs in flow-through}) / (p27 \text{ concentration of}$   
169  $\text{virus in flow-through of virus-only control})] \times 100\%$ .

170 The percentage of captured infectious virions (iVirion) was calculated as:  
171  $iVirion = [1 - (\text{flow-through infectivity of virus with mAbs}) / (\text{flow-through infectivity of virus-}$   
172  $\text{only control infectivity})] \times 100\%$ .

173

## 174 **Results**

### 175 **Dynamic light scattering to determine size of 33C6 mAbs**

176 The particle sizes of the purified 33C6-IgM and 33C6-IgG1 were measured by Dynamic Light  
177 Scattering as described above. The experiment was repeated 4 times on each sample, and  
178 representative data are shown. In the experiment shown, 100% of the mass of the IgM antibody  
179 was found in a particle with a diffusion coefficient of  $1.98 \times 10^{-7} \text{ cm}^2/\text{s}$ , a radius of 11.4 nm, 15.3%  
180 polydispersity, and a mass of 994,000 Da. The average mass from the 4 independent measurements  
181 was calculated as  $994,000 \pm 23,000 \text{ Da}$ . This is consistent with the MW expected for the  
182 pentameric particle, since the masses of 1 J chain, 10 heavy chains, and 10 light chains as  
183 calculated from the amino acid sequence is 874,707 Da, which is expected to be further increased  
184 by glycosylation. In the experiment shown, 100% of the mass of the IgG1 antibody was found in  
185 a particle with a diffusion coefficient of  $4.47 \times 10^{-7} \text{ cm}^2/\text{s}$ , a radius of 5.0 nm, 24.9% polydispersity,  
186 and a mass of 148,000 Da. The average mass from the 4 independent measurements was calculated  
187 as  $148,000 \pm 3,600 \text{ Da}$ . This is consistent with the MW expected for the monomeric particle, since



188 the masses of 2 heavy chains and 2 light chains is 145,291 Da, which is expected to be further  
189 increased by glycosylation.

190 **References**

- 191 1. Sholukh AM, Mukhtar MM, Humbert M, Essono SS, Watkins JD, Vyas HK, *et al.*  
192 **Isolation of monoclonal antibodies with predetermined conformational epitope**  
193 **specificity.** *PLoS One* 2012,**7**:e38943.
- 194 2. Watkins JD, Sholukh AM, Mukhtar MM, Siddappa NB, Lakhashe SK, Kim M, *et al.*  
195 **Anti-HIV IgA isotypes: differential virion capture and inhibition of transcytosis are**  
196 **linked to prevention of mucosal R5 SHIV transmission.** *AIDS* 2013,**27**:F13-20.
- 197 3. Hofmann-Lehmann R, Swenerton RK, Liska V, Leutenegger CM, Lutz H, McClure HM,  
198 *et al.* **Sensitive and robust one-tube real-time reverse transcriptase-polymerase**  
199 **chain reaction to quantify SIV RNA load: comparison of one- versus two-enzyme**  
200 **systems.** *AIDS Res Hum Retroviruses* 2000,**16**:1247-1257.
- 201 4. Cole KS, Murphey-Corb M, Narayan O, Joag SV, Shaw GM, Montelaro RC. **Common**  
202 **themes of antibody maturation to simian immunodeficiency virus, simian-human**  
203 **immunodeficiency virus, and human immunodeficiency virus type 1 infections.** *J*  
204 *Virol* 1998,**72**:7852-7859.
- 205 5. Montefiori DC. **Evaluating neutralizing antibodies against HIV, SIV, and SHIV in**  
206 **luciferase reporter gene assays.** *Curr Protoc Immunol* 2005,**Chapter 12**:Unit 12.11.

207
